# Supplementary material for: Medium-chain triglycerides (8:0 and 10:0) increase muscle mass and function in frail older adults: a combined data analysis of clinical trials
Source: Frontiers journal article supplement (doi:10.3389/fnut.2023.1284497), 2023-12-04
Supplement: Table_2.pdf [file Table_2.pdf]

**Supplementary Table S2.** Effect of allocation to trial in combined data analysis; muscle strength and function at baseline and after the 3-mo intervention and their changes from baseline in the MCTs-containing (MCT or LD + MCT) and LCTs-containing (LCT or LD + LCT) groups ( $n = 56$ )<sup>1</sup>.

| Measure                                                     | Group         | <i>n</i> | Baseline      | 3-mo intervention | Non-adjusted change | Adjusted change for baseline <sup>3</sup> | Adjusted change for trial <sup>4</sup> | Adjusted change for baseline & trial <sup>5</sup> |
|-------------------------------------------------------------|---------------|----------|---------------|-------------------|---------------------|-------------------------------------------|----------------------------------------|---------------------------------------------------|
| Right-hand grip strength, kg<br><i>P</i> value <sup>2</sup> | MCT, LD + MCT | 29       | 11.3 ± 7.6    | 13.0 ± 7.2***     | 1.7 ± 2.0           | 1.7 (1.1, 2.3)                            | 1.7 (1.1, 2.3)                         | 1.7 (1.1, 2.3)                                    |
|                                                             | LCT, LD + LCT | 25       | 11.7 ± 5.1    | 11.8 ± 4.9        | 0.2 ± 1.3           | 0.2 (-0.5, 0.8)                           | 0.1 (-0.5, 0.8)                        | 0.2 (-0.5, 0.8)                                   |
|                                                             |               |          |               |                   | 0.002               | 0.001                                     | 0.001                                  | <0.001                                            |
| Left-hand grip strength, kg<br><i>P</i> value               | MCT, LD + MCT | 27       | 10.2 ± 4.6    | 11.4 ± 4.5        | 1.3 ± 2.6           | 1.2 (0.3, 2.1)                            | 1.3 (0.3, 2.2)                         | 1.2 (0.3, 2.2)                                    |
|                                                             | LCT, LD + LCT | 25       | 10.8 ± 5.4    | 11.6 ± 5.5        | 0.8 ± 2.3           | 0.8 (-0.1, 1.8)                           | 0.8 (-0.2, 1.8)                        | 0.8 (-0.1, 1.8)                                   |
|                                                             |               |          |               |                   | 0.51                | 0.57                                      | 0.51                                   | 0.57                                              |
| Walking speed, m/s<br><i>P</i> value                        | MCT, LD + MCT | 23       | 0.637 ± 0.409 | 0.706 ± 0.427**   | 0.069 ± 0.124       | 0.068 (0.022, 0.113)                      | 0.069 (0.025, 0.113)                   | 0.068 (0.022, 0.113)                              |
|                                                             | LCT, LD + LCT | 20       | 0.436 ± 0.257 | 0.420 ± 0.285     | -0.016 ± 0.073      | -0.014 (-0.062, 0.035)                    | -0.016 (-0.063, 0.032)                 | -0.014 (-0.063, 0.035)                            |
|                                                             |               |          |               |                   | 0.011               | 0.020                                     | 0.012                                  | 0.021                                             |
| Legs open and close test, n/10 s<br><i>P</i> value          | MCT, LD + MCT | 28       | 4.14 ± 3.13   | 6.48 ± 3.90***    | 2.34 ± 1.88         | 2.32 (1.67, 2.97)                         | 2.34 (1.70, 2.99)                      | 2.32 (1.67, 2.98)                                 |
|                                                             | LCT, LD + LCT | 22       | 5.80 ± 2.89   | 4.96 ± 2.59*      | -0.84 ± 1.35        | -0.82 (-1.56, -0.08)                      | -0.85 (-1.57, -0.12)                   | -0.82 (-1.57, -0.08)                              |
|                                                             |               |          |               |                   | < 0.001             | <0.001                                    | <0.001                                 | <0.001                                            |
| Peak expiratory flow, L/min<br><i>P</i> value               | MCT, LD + MCT | 25       | 189 ± 83      | 220 ± 82**        | 31 ± 48             | 32 (13, 52)                               | 32 (13, 51)                            | 33 (15, 52)                                       |
|                                                             | LCT, LD + LCT | 26       | 173 ± 66      | 179 ± 75          | 6 ± 50              | 5 (-14, 24)                               | 5 (-13, 24)                            | 4 (-14, 22)                                       |
|                                                             |               |          |               |                   | 0.08                | 0.049                                     | 0.045                                  | 0.028                                             |

<sup>1</sup>Values are means ± SD or adjusted mean (95% CI). Difference from baseline by Wilcoxon signed-rank test, \* $P < 0.05$ , \*\* $P < 0.01$ , \*\*\* $P < 0.001$ .

<sup>2</sup> $P$  value represents the differences in the changes of variables between the 2 groups assessed by 1-factor ANCOVA, <sup>3</sup>adjusted for each baseline value (model 1), <sup>4</sup>adjusted for allocation to trial (Trials 1 or 2), and <sup>5</sup>adjusted for baseline values of each measurement and allocation to trial.

LCT, 6 g/d of long-chain triglycerides; LD + LCT, leucine and cholecalciferol-enriched supplement with 6 g/d of long-chain triglycerides; LD + MCT, leucine and cholecalciferol-enriched supplement with 6 g/d of medium-chain triglycerides; MCT, 6 g/d of medium-chain triglycerides.
